## RESEARCH ARTICLE

# High prevalence of olfactory impairment among leprosy patients: A cross-sectional study

Rogério Nabor Kondo<sup>1</sup> <sup>1#a\*</sup>, Milene Cripa Pizzato de Araújo<sup>1</sup>, Paulo Muller Ramos<sup>2</sup>, Hélio Amante Miot<sup>2</sup>, Marco Aurélio Fornazieri<sup>3,4,5,6#a,b</sup>

**1** Clinical Medicine Department, Dermatology, Universidade Estadual de Londrina, Londrina, Paraná, Brazil, **2** Dermatology Department of São Paulo State University, Botucatu, São Paulo, Brazil, **3** Department of Clinical Surgery, Universidade Estadual de Londrina, Londrina, Paraná, Brazil, **4** Department of Medicine, Pontifícia Universidade Católica do Paraná, Londrina, Paraná, Brazil, **5** Department of Otorhinolaryngology, Universidade de São Paulo, São Paulo, Brazil, **6** Smell and Test Center, Department of Otorhinolaryngology–Head and Neck Surgery, Perelman School of Medicine, University of Pennsylvania

<sup>#a</sup> Current address: Clinical Medicine Department, Dermatology, State University of Londrina, Londrina, Paraná, Brazil

<sup>#b</sup> Current address: Surgery Department, Otolaryngology, State University of Londrina, Londrina, Paraná, Brazil

\* [kondo.dermato@gmail.com](mailto:kondo.dermato@gmail.com)

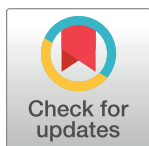

## OPEN ACCESS

**Citation:** Kondo RN, Araújo MCPd, Ramos PM, Miot HA, Fornazieri MA (2023) High prevalence of olfactory impairment among leprosy patients: A cross-sectional study. *PLoS Negl Trop Dis* 17(4): e0010888. <https://doi.org/10.1371/journal.pntd.0010888>

**Editor:** Paul J. Converse, Johns Hopkins University, UNITED STATES

**Received:** October 17, 2022

**Accepted:** March 3, 2023

**Published:** April 5, 2023

**Copyright:** © 2023 Kondo et al. This is an open access article distributed under the terms of the [Creative Commons Attribution License](https://creativecommons.org/licenses/by/4.0/), which permits unrestricted use, distribution, and reproduction in any medium, provided the original author and source are credited.

**Data Availability Statement:** We provide the data repository with link (<https://datadryad.org/stash/share/jesXSDi0ENN97PMsfZ7BaxtEJuiWqKrxpuJ0dCtXR0>).

**Funding:** The authors received no specific funding for this work.

**Competing interests:** There is no conflict of interest.

## Abstract

### Background

The effect of leprosy on the sense of smell is not yet fully established. Studies that have relied only on patients' perceptions may have under- or over-estimated the change in smell perception. A validated and psychophysical method is necessary to avoid these errors in assessment.

### Objectives

This study aimed to validate the existence of olfactory involvement in leprosy patients.

### Methods

A cross-sectional, controlled study was conducted, in which individuals with leprosy (exposed individuals) and individuals without leprosy (control patients) were recruited. For each exposed individual, we selected two control patients. A total of 108 patients (72 control patients and 36 exposed individuals) with no history of infection with the new coronavirus (COVID-19) took the University of Pennsylvania Smell Identification Test (UPSIT).

### Results

Most exposed individuals had olfactory dysfunction [ $n = 33$ , 91.7% (CI 95%: 77.5%–98.3%)] when compared with the control patients [ $n = 28$ , 38.9% (CI 95%: 27.6%–51.1%)], but only two (5.6%) had olfactory complaints. The olfactory function was significantly worse among exposed individuals [UPSIT leprosy = 25.2 (CI 95%: 23.1–27.3) when compared with the

UPSIT control patients = 34.1 (CI 95%: 33.0–35.3);  $p < 0.001$ ). The risk of olfactory loss was higher among the exposed individuals [OR: 19.5 (CI 95%: 5.18–105.70;  $p < 0.001$ )].

## Conclusions

Olfactory dysfunction was highly prevalent among exposed individuals, although they had little or no self-knowledge of the disorder. The results show that it is important to assess the sense of smell in exposed individuals.

## Author summary

Leprosy is one of the oldest neurocutaneous diseases in the world. However, it has been neglected by the general population, doctors, and scientists. Transmitted by *Mycobacterium leprae* and *Mycobacterium lepromatosis*, leprosy is met with stigma and prejudice. Some patients with leprosy (exposed individuals) keep their diagnosis a secret, fearing a negative impact on their social lives. The disease is characterized by white or red skin lesions associated with local numbness. Few studies have evaluated smell among exposed individuals, but they have not used the University of Pennsylvania Smell Identification Test (UPSIT), which is a validated psychophysical method. The present study found a high prevalence of olfactory impairment (91.7%) among exposed individuals, accompanied by low self-knowledge of the disorder (5.6%). It is thus important to assess the sense of smell in infected individuals, as this sensorineural assessment has not been performed as a routine for patients.

## Introduction

Leprosy, or Hansen's Disease (HD), is a chronic granulomatous neurocutaneous disease that is caused by non-culturable acid-alcohol-resistant bacilli, *Mycobacterium leprae* and *Mycobacterium lepromatosis* [1,2]. These infectious agents multiply slowly, and the incubation period is long (about five years, but can exceed 40 years) [3]. Traditionally one of the most stigmatized diseases, leprosy continues to be associated with the ideas of sin, impurity, and punishment [4]. Even though the disease has a cure, some patients keep their diagnosis a secret, fearing a negative and stigmatizing image, as seen throughout history [5].

Despite efforts to eradicate it world over [6], leprosy is a neglected disease. Brazil, where this study was conducted, has the second largest number of cases in the world, preceded by India [7]. At the beginning of the 2000s, approximately 94% of new cases diagnosed in the Americas are reported in Brazil. Northeast, North, and Midwest Brazil report the highest incidence. Fortunately, over the last few decades, prevalence rates have fallen as a result of the consolidation of multidrug therapies (MDT) [8].

Leprosy affects the cooler regions of the body, mainly the skin, peripheral nerves, eyes, and the mucous membrane of the upper respiratory tract [1]. It affects hearing [9], vision [10], taste [11], and smell [12]. The data, based on the evaluation method, suggest that olfactory dysfunction occurs in 40–100% of leprosy cases, which may help diagnose the disease, and facilitate the implementation of timely interventions [12,13]. However, less accurate olfactory tests were used in these studies. Some studies have suggested that patients are often unaware of an olfactory loss [14], which brings into question whether the prevalence of olfactory loss in leprosy is likely to be much higher than expected.

Just as the nasal deformity alters the quality of life of several patients [15], olfactory alterations can have negative consequences for these individuals, especially once it influences their nutrition, safety, and well-being [16]. This study explores the olfactory dysfunctions and encourages an evaluation routine among leprosy patients through a complete, validated olfactory test [17].

## Methods

A cross-sectional, controlled study was conducted, in which individuals with leprosy (exposed individuals) and individuals without leprosy (control patients) were recruited. For each exposed individual (new cases sampled at the time of diagnosis and existing cases undergoing MDT), we selected two control patients. The study was conducted through non-probabilistic convenience sampling, which means that all cases of leprosy in the city of Londrina-PR, from March 1, 2021 to February 28, 2022, were included in the study, provided that they met the inclusion/exclusion criteria and that the patients involved agreed to participate. A signed consent form was obtained from all patients before participation. The study was approved by the Ethics Committee in Research Involving Human Beings at State University of Londrina, CAAE: 42159420.0.0000.523.

We excluded patients aged under 18 years [17], those who had olfactory disease caused by traumatic brain injury, radiation therapy to the face, and post-airway infection dysfunctions (including COVID-19) [18], and those who did not understand the procedures involved in the test (16 individuals in all).

For data collection, patients were asked to fill out a form and medical information was retrieved from their electronic medical records. A test with 40 odors, namely the University of Pennsylvania Smell Identification Test (UPSIT) [17], was conducted to assess the olfactory function. Each participant was given 4 booklets with 10 substances, which they had to scrape and sniff, before identifying them by marking an option from among four alternatives. They had to choose one (see supplementary material). The UPSIT value ranged from 0 to 40, based on the number of correct answers, classifying the olfactory function of the individual as normosmia, hyposmia, anosmia, or possible simulator. This categorization differed when applied to men and women, wherein the latter presented greater olfactory acuity [17].

We performed Fisher's Exact Test to compare categorical variables. Continuous variables were analyzed using the Wilcoxon-Mann-Whitney Test. After verifying the normality of the quantitative variables using the Shapiro-Wilk test, the nonparametric Mann-Whitney and Kruskal-Wallis tests were used to compare the results obtained. Spearman's nonparametric correlation test was used to verify the relationship between discrete quantitative variables. A comparison of the risk of olfactory loss between the exposed and control groups was carried out using logistic regression. We considered the values of statistical significance ( $p$ -value) under 0.05. The 95% confidence interval was calculated. All data were compiled in an Excel spreadsheet for further statistical analysis. Stata (version 13.0, Statacorp Texas), Jamovi, and R studio were used for statistical analysis.

## Results

We recruited 108 individuals (36 exposed individuals, 72 control patients). Table 1 presents the main data. The average age of the individuals was 53.3 years (range: 24–91 years). Further, 52.8% were men and 47.2% were women. Most exposed individuals had olfactory disorders [ $n = 33$  or 91.7% (CI 95%: 77.5–98.3)] when compared to the control group [ $n = 28$  or 38.9% (CI 95%: 27.6%–51.1%)], but only two (5.6%) had olfactory complaints. Multibacillary (86.1%)

**Table 1. Clinical and demographic characteristics (N = 108).**

| Characteristics                    | Leprosy (n = 36) | Control (n = 72) |
|------------------------------------|------------------|------------------|
| Age, years                         |                  |                  |
| mean±SD                            | 53.3±18.1        | 53.3±18.1        |
| minimum–maximum                    | 24–91            | 24–91            |
| Sex, n° (%)                        |                  |                  |
| male                               | 19 (52.8)        | 38 (52.8)        |
| female                             | 17 (47.2)        | 34 (47.2)        |
| Race, n° (%) #                     |                  |                  |
| white                              | 21 (58.6)        | 43 (59.7)        |
| non-white                          | 15 (41.4)        | 29 (40.3)        |
| Salary income per family, n° (%)\$ |                  |                  |
| 2 or less                          | 23 (63.9)        | 32 (44.4)        |
| 3–4                                | 8 (22.2)         | 38 (52.8)        |
| 5–9                                | 3 (8.3)          | 2 (2.8)          |
| 10–19                              | 1 (2.8)          | 0 (0.0)          |
| More than 20                       | 1 (2.8)          | 0 (0.0)          |
| Level of schooling, n° (%)         |                  |                  |
| incomplete middle school           | 13 (36.1)        | 13 (18.1)        |
| < middle school                    | 6 (16.7)         | 5 (6.9)          |
| some high school                   | 3 (8.3)          | 1 (1.4)          |
| complete high school               | 7 (19.4)         | 23 (32.0)        |
| some college                       | 1 (2.8)          | 6 (8.3)          |
| bachelors or higher                | 6 (16.7)         | 24 (33.3)        |
| Leprosy classification, n° (%) §   |                  |                  |
| multibacillary                     | 31 (86.1)        | not applicable   |
| paucibacillary                     | 5 (13.9)         | not applicable   |
| Grade 1 disability, n° (%) &       |                  |                  |
| with incapacity                    | 6 (16.7)         | not applicable   |
| Olfactory complaints, n° (%) *     |                  |                  |
| with complaints                    | 2 (5.6)          | not applicable   |
| Smoking history, n° (%)            |                  |                  |
| with history                       | 4 (11.1)         | 26 (36.1)        |
| UPSIT                              |                  |                  |
| altered, n° (%)                    | 33 (91.7)        | 28 (38.9)        |
| mean±SD                            | 25.2±6.2         | 34.1±1.2         |
| minimum–maximum                    | 8–36             | 21–40            |
| Nasal deformity, n° (%)            |                  |                  |
| with deformity ¶                   | 3 (8.3)          | not applicable   |
| Laboratory tests, n° (%)           |                  |                  |
| altered †                          | 6 (16.7)         | not applicable   |

# self-defined race by participants.

\$ minimum wage in Brazil in 2021.

§ Borderline-borderline (20/36); Lepromatous leprosy (4/36); Borderline-lepromatous (4/36); Tuberculoid (4/36); Borderline-tuberculoid (3/36); Indeterminate (1/36).

\* olfactory complaint self-reported by the participant before the test was conducted.

¶ deviated septum (2/36); nasal polyp (1/36)

† changes related to cholesterol, blood glucose, thyroid-stimulating hormone (TSH), and iron deficiency anemia.

<https://doi.org/10.1371/journal.pntd.0010888.t001>

Table 2. UPSIT based on sex distribution (N = 108).

| UPSIT                    | Leprosy group |             | Control group |             |
|--------------------------|---------------|-------------|---------------|-------------|
|                          | Female n = 17 | Male n = 19 | Female n = 34 | Male n = 38 |
| Anosmia (n, %)           | 2 (1.8)       | 3 (2.8)     | 0 (0.0)       | 0 (0.0)     |
| Severe hyposmia (n, %)   | 5 (4.6)       | 9 (8.3)     | 2 (1.8)       | 3 (2.8)     |
| Moderate hyposmia (n, %) | 6 (5.6)       | 2 (1.8)     | 0 (0.0)       | 3 (2.8)     |
| Mild hyposmia (n, %)     | 2 (1.8)       | 4 (3.6)     | 7 (6.5)       | 13 (12.0)   |
| Normosmia (n, %)         | 2 (1.8)       | 1 (0.9)     | 26 (24.1)     | 18 (16.7)   |

<https://doi.org/10.1371/journal.pntd.0010888.t002>

prevailed, with the borderline-borderline form being the most prevalent in the clinical classification, with 20 cases (55.6%).

The two exposed individuals (5.6%) who were conscious of their olfactory loss were both men and had the borderline form. One was 45 years of age and a smoker of 14 pack-years, and had severe hyposmia (UPSIT = 22). The other was 62 years of age, and had anosmia (UPSIT = 8).

Olfactory function was significantly worse among exposed individuals [UPSIT leprosy = 25.2 (CI 95%: 23.1–27.3) vs. UPSIT controls = 34.1 (CI 95%: 33.0–35.3);  $p < 0.001$ ]. The risk of olfactory loss was higher among the exposed individuals [odds ratio (OR): 19.5 (CI 95%: 5.18–105.70;  $p < 0.001$ )]. Olfactory function was negatively and positively correlated with age ( $p = 0.032$ ) and educational level ( $p = 0.028$ ), respectively. Most exposed individuals had anosmia or severe hyposmia (5 and 14, respectively), whereas control patients had normosmia or mild hyposmia (44 and 20, respectively; see Tables 1, 2 and 3).

Correlation analysis was conducted to verify the correlation between age and UPSIT scores (Spearman's rho = -0.36; CI 95%: -0.521 to -0.031;  $p = 0.032$ ). In relation to family income and olfactory function, correlation analysis was performed (Spearman's rho = 0.06;  $p = 0.720$ ; see Table 3). No correlation was found between treatment duration and UPSIT scores (Spearman's rho = 0.01;  $p = 0.965$ , Table 3, Figs 1 and 2).

Women scored 1.97 and 1.68 more points in the UPSIT than did men among the exposed individuals (Spearman's rho = 0.028;  $p = 0.46$ ) and control patients (Spearman's rho = 0.196;  $p = 0.09$ ), respectively. To analyze the response variable (UPSIT) as a function of the ordinal qualitative explanatory variables (education), correlation analysis was performed [exposed individuals (Spearman = 0.37; CI 95%: 0.048–0.561;  $p = 0.028$ )] vs. [control patients (Spearman's rho = 0.36; CI 95%: 0.326–1.500;  $p = 0.002$ )] (see Table 3).

We performed a normality test (Shapiro-Wilk) among exposed individuals to verify the response variable (UPSIT) as a function of the explanatory multivariable of sex, age, and

Table 3. UPSIT correlation coefficients with select characteristics (N = 108).

| Variables          | Leprosy group (n = 36) |       | Control group (n = 72) |        |
|--------------------|------------------------|-------|------------------------|--------|
|                    | Rho                    | p     | Rho                    | p      |
| Age                | -0.36                  | 0.032 | -0.56                  | <0.001 |
| Level of schooling | 0.37                   | 0.028 | 0.36                   | 0.002  |
| Family income      | 0.06                   | 0.720 | 0.14                   | 0.222  |
| Treatment duration | 0.01                   | 0.965 | Na                     | Na     |

UPSIT: University of Pennsylvania Smell Identification Test, Rho: Spearman's rho correlation coefficient, Na: not applicable.

Schooling and income variables were categorized from 1 to 6, and 1 to 5, respectively.

<https://doi.org/10.1371/journal.pntd.0010888.t003>

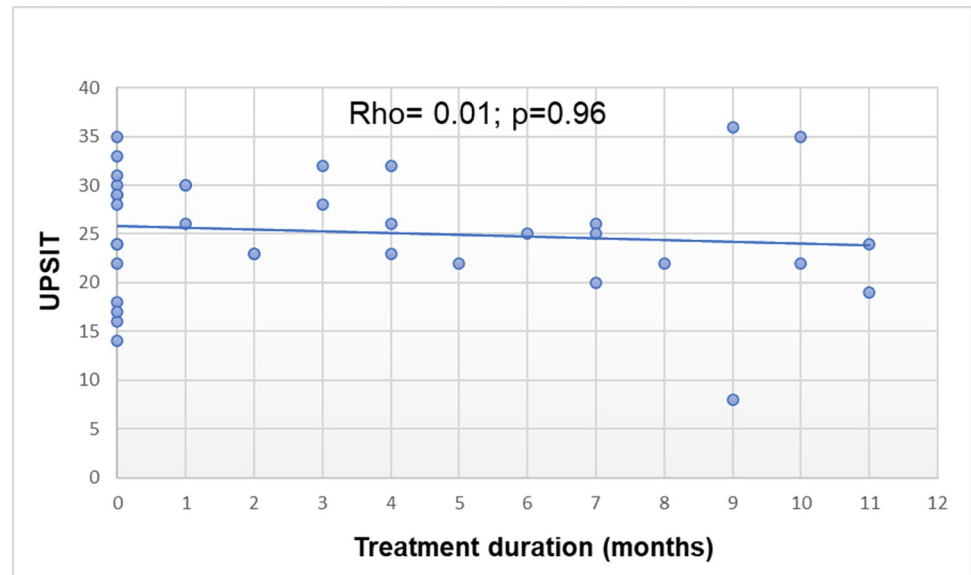

**Fig 1. Correlation between UPSIT and treatment duration in months.** Rho: Spearman's correlation coefficient.

<https://doi.org/10.1371/journal.pntd.0010888.g001>

schooling (nominal, discrete, and ordinal qualitative, respectively). The residuals followed normal distribution, with adjusted  $R^2$  (0.639) and Akaike information criterion (184). The best female UPSIT interaction model was  $29.7 + (2.3 \times \text{sex}) + (-0.12 \times \text{age}) + (1.04 \times \text{education})$  and  $p = 0.033$ .

Among the exposed individuals, only six patients (16.7%) had a degree of disability, namely grade 1. Four patients (11.1%) had a history of smoking, with 10, 11, 14, and 24 cigarette pack-years. None of the patients had septum perforation and nasal collapse. Deformities (8.3%) were related to septal deviation and the presence of polyps (see Table 1).

To evaluate UPSIT as a function of other variables (income, degree of disability, smoking, olfactory complaints, reactions, deformities, and duration of treatment and the disease), other multivariate analyses were performed but had no statistical significance ( $p > 0.05$ ). Table 4 shows that gasoline (25% correct) and leather (25% correct), and pickles (54.2% correct) and motor oil (56.9% correct) were the substances with the greatest errors in identification among exposed individuals and control patients, respectively.

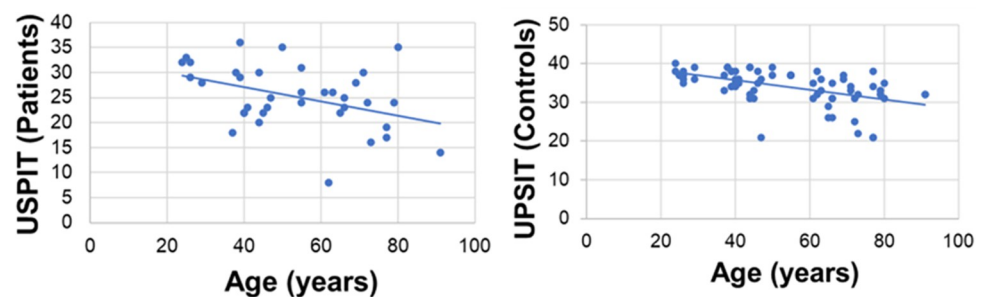

**Fig 2. Scatter plot showing UPSIT based on age between the exposed individuals and control patients.** Both groups show a negative correlation (Rho = -0.36,  $p = 0.032$  and Rho = -0.56,  $p < 0.001$ , respectively). Rho: Spearman's correlation coefficient.

<https://doi.org/10.1371/journal.pntd.0010888.g002>

**Table 4. Percentage of correct answers for each odorant among exposed individuals and control patients (N = 108).**

| Odorants       | Leprosy group (n = 36) | Control group (n = 72) | p*     |
|----------------|------------------------|------------------------|--------|
| 01.Pizza       | 33.3                   | 70.8                   | <0.001 |
| 02.Bubble gum  | 55.6                   | 84.7                   | 0.002  |
| 03.Menthol     | 63.9                   | 94.4                   | <0.001 |
| 04.Cherry      | 72.2                   | 94.4                   | 0.002  |
| 05.Motor oil   | 69.4                   | 56.9                   | 0.295  |
| 06.Mint        | 83.3                   | 97.2                   | 0.016  |
| 07.Banana      | 61.1                   | 86.1                   | 0.006  |
| 08.Clove       | 63.9                   | 95.8                   | <0.001 |
| 09.Leaner      | 25.0                   | 93.1                   | <0.001 |
| 10.Coconut     | 52.8                   | 93.1                   | <0.001 |
| 11.Onion       | 83.3                   | 98.6                   | 0.005  |
| 12.Fruit juice | 58.3                   | 88.9                   | <0.001 |
| 13.Baby powder | 86.1                   | 97.2                   | 0.040  |
| 14.Jasmine     | 52.8                   | 88.9                   | <0.001 |
| 15.Cinnamon    | 75.0                   | 87.5                   | 0.110  |
| 16.Gasoline    | 25.0                   | 90.3                   | <0.001 |
| 17.Strawberry  | 75.0                   | 83.3                   | 0.314  |
| 18.Coffee      | 38.9                   | 87.5                   | <0.001 |
| 19.Gingerbread | 72.2                   | 80.6                   | 0.337  |
| 20.Apple       | 72.2                   | 65.3                   | 0.519  |
| 21.Perfume     | 80.6                   | 90.3                   | 0.223  |
| 22.Flower      | 61.1                   | 93.1                   | <0.001 |
| 23.Peach       | 75.0                   | 84.7                   | 0.293  |
| 24.Tire rubber | 80.6                   | 95.8                   | 0.015  |
| 25.Pickles     | 80.6                   | 54.2                   | 0.011  |
| 26.Pineapple   | 66.7                   | 98.6                   | <0.001 |
| 27.Raspberly   | 86.1                   | 86.1                   | 1.00   |
| 28.Orange      | 30.6                   | 84.7                   | <0.001 |
| 29.Walnut      | 52.8                   | 65.3                   | 0.218  |
| 30.Watermelon  | 66.7                   | 86.1                   | 0.024  |
| 31.Solvent     | 66.7                   | 73.6                   | 0.502  |
| 32.Grass       | 66.7                   | 56.9                   | 0.406  |
| 33.Smoke       | 77.8                   | 88.9                   | 0.154  |
| 34.Wood        | 61.1                   | 90.3                   | 0.001  |
| 35.Grape       | 66.7                   | 90.3                   | 0.006  |
| 36.Garlic      | 86.1                   | 88.9                   | 0.757  |
| 37.Soap        | 83.3                   | 90.3                   | 0.352  |
| 38.Natural gas | 75.0                   | 90.3                   | 0.046  |
| 39.Rose        | 63.9                   | 79.2                   | 0.106  |
| 40.Peanut      | 75.0                   | 91.7                   | 0.035  |

\*Statistical significance assessed with Fisher exact test.

<https://doi.org/10.1371/journal.pntd.0010888.t004>

## Discussion

Olfactory dysfunction was highly prevalent among exposed individuals (91.7%), although they had little or no self-knowledge of the disorder (5.6%). Olfactory function was significantly worse among exposed individuals [UPSIT leprosy = 25.2 (CI 95%: 23.1–27.3)] when compared

with the control patients [UPSIT control patients = 34.1 (CI 95%: 33.0–35.3);  $p < 0.001$ ]. The risk of olfactory loss (Odds ratio or OR) was higher among exposed individuals [OR: 19.5 (CI 95%: 5.18–105.70;  $p < 0.001$ )].

Mishra et al. (2006) [14] investigated olfactory dysfunction in leprosy patients, and reported olfactory impairment in all exposed individuals in their sample. They used an olfactory test involving 12 substances (the Brief-Smell Identification Test, or B-SIT). Unfortunately, this smaller test does not classify an individual as having anosmia, or mild, moderate, or severe hyposmia, as in the UPSIT [19] (see Supplementary Material).

As identified by previous studies that observed the olfactory alteration in leprosy [13,14], we need to analyze and understand the prevalence of olfactory alteration in leprosy. Acknowledging this, we realized that olfactory assessments are not routinely undertaken, as is this case, for example, concerning the ophthalmic part, also affected by leprosy. Thus, the study shows the importance of conducting chemosensory tests on a regular basis.

In exposed individuals, there was a negative between the UPSIT and age (Spearman's rho = -0.36; CI 95%: -0.521 to -0.031;  $p = 0.032$ ). Doty and Kamath (2014) described a decrease in smell with age in the general population [20]. Therefore, the tendency to lose the sense of smell with advancing age may exist among exposed individuals (Table 3).

Our study showed that women tended to have better UPSIT scores [17]. Women scored 1.97 more point than men. Although previous research showed an association [21], the family income of this sample studied was not relevant vis-a-vis the UPSIT (Spearman = 0.06;  $p = 0.46$ ) (Table 3). The education attainment of the individuals in the sample studied showed a positive correlation with the UPSIT, which was statistically significant (Spearman = 0.37; CI 95%: 0.048–0.561;  $p = 0.028$ ). Fornazieri et al. (2019) claimed that a better olfactory function exists among individuals in the general population with a higher level of educational attainment because these individuals may use cognitive strategies and life experiences to differentiate the sense of smell. This pattern of better UPSIT values with higher levels of education may exist among exposed individuals [21] (Table 3).

Treatment duration did not have a significant positive correlation with the UPSIT (Spearman = 0.008;  $p = 0.965$ ; see Table 3 and Fig 1). When Mishra et al. (2006) applied the B-SIT test, they did not show any improvement in olfactory function with treatment [14]. For the prognosis of improvement, this finding is problematic, given that the treatment may not improve this function and that sometimes, it does not improve the thermal, painful, and tactile sensitivities, because of the destruction of the sensory nerves. Mishra et al. showed greater loss in the Virchowian pole [14]. However, our results indicated no correlation with the UPSIT (Spearman = 0.178;  $p = 0.070$ ) because 55% of the individuals presented borderline-borderline, and only 11% presented the lepromatous leprosy.

The anatomical alterations were low among exposed individuals ( $n = 3$ , or 8.3%). There were no cases of septal perforation and nasal alae collapse. The history of smoking in the sample was low ( $n = 4$ , or 11.1%). Only six patients (16%) had a degree of disability (grade 1). Owing to these low numbers, it was not possible to establish a correlation between these findings and the UPSIT (see Table 1).

The authors are concerned that gasoline was one of the substances with the greatest errors in identification (25% accuracy), as it is a flammable, combustible material. A patient with leprosy may have a certain degree of visual and tactile incapacity and, without realizing it, may put their life at risk.

Multiple factors may be involved in anosmia (total loss of smell) or hyposmia (decreased smell) in leprosy, such as the direct action of the agent causing damage to the olfactory receptors and bulb in the disease process. Bipolar olfactory cells are not myelinated and therefore germinate from basal cells and project directly into the olfactory bulb through the cribriform

plate, as these are invasion routes for toxic agents, viruses, and bacilli (such as *M. leprae* and *M. lepromatosis*).

Leprosy is a secondary cause of atrophic rhinitis [14]. The main characteristics of leprosy rhinitis are chronicity, the absence of acute phenomena, and the incomplete obstruction of the nasal mucosa, presenting dryness and crust-formation [22]. As the condition progresses, it frequently produces perforations of the septum, and causes the destruction of the cartilaginous part and collapse of the nasal ala [23].

We hypothesize that olfactory loss in patients with leprosy may occur because of the involvement and destruction of receptor axons and the olfactory bulb by the bacillus, as they are situated in the paths taken by the agent, as is the case with other aggressive agents.

Olfactory dysfunction may be related to the lack of full recovery of smell because of the latency of the onset of symptoms and their treatment, as it happens in some infections like COVID-19 [18,24]. As leprosy is a neglected disease, there may be a delay in the diagnosis and initiation of treatment; and a delay of six months of typical nervous symptoms of leprosy is usually irreversible [1]. The lack of correlation between the duration of the disease and a poor UPSIT score in the present study may have been related to the patients' delay in noticing the initial spots and suspecting leprosy only when there was a lack of sensitivity. This may mean that the duration of the disease reported by the patients may have been underestimated in relation to the point in time when it was contracted.

The present study did not observe septum perforations and nasal ala collapse, both of which can negatively influence olfactory function. We encourage a frequent clinical evaluation of patients with leprosy through the UPSIT, because most exposed individuals presented high prevalence of the disease (91.7%), whereas only 5.6% were able to acknowledge the loss of the sense of smell. Leprosy is thus a silent and reckless disorder, as smell is also a sense of alertness and protection.

One limitation of this study is that it was cross-sectional, and used a convenience sample based only on participants living in Londrina-PR. The exclusion of participants also limited our study, as we excluded symptomatic participants infected by COVID-19 ( $n = 14$ ) in addition to one individual who had traumatic brain injury (stroke) and was unable to understand the complexity of the test ( $n = 1$ ). Previous infection with the SARS-CoV-2 can permanently impair olfactory capacity. Confirmation bias may have occurred in the study owing to the different cognitive levels among the participants.

## Conclusion

Most individuals examined presented olfactory dysfunction (91.7%). Only 5.6% were able to acknowledge the loss of the sense of smell, suggesting that it is important to assess the sense of smell in patients with leprosy. Olfactory alterations were correlated with patients with lower educational attainment and older age groups.

## Supporting information

**S1 Fig. UPSIT offers 4 booklets, containing 10 pages each, totaling 40 substances in all.**

**Source:** Author's own illustration based on current booklets.

(TIFF)

**S2 Fig. To release the odorant, the patient scrapes the square in the lower corner of each page using a pencil suitable for the test.** Once the odorant is released, the patient must choose one of the four alternatives presented to identify the odor. **Source:** Author's own illustration based on current booklets.

(TIF)

**S3 Fig. Researcher holds the booklet as an example of how the test is performed.** After scraping the square in the lower page, the individual smells the odorant and tries to identify the substance. Then, they select the appropriate option on the page. **Source:** Author's own photo file.  
(TIFF)

**S1 Table. UPSIT denotes University of Pennsylvania Smell Identification Test.**  
(DOCX)

**S2 Table. UPSIT denotes University of Pennsylvania Smell Identification Test.**  
(DOCX)

**S1 STROBE. STROBE Statement—checklist of items that should be included in reports of observational studies.**  
(PDF)

## Acknowledgments

We are grateful to Cristina Maria Aranda, a dermatologist who helped us with data collection, and to “Policlínica Municipal de Londrina” and the “Consórcio Intermunicipal de Saúde do Médio Paranapanema,” which allowed us to conduct this study.

## Author Contributions

**Conceptualization:** Rogério Nabor Kondo, Milene Cripa Pizzato de Araújo, Paulo Muller Ramos, Hélio Amante Miot, Marco Aurélio Fornazieri.

**Data curation:** Rogério Nabor Kondo, Milene Cripa Pizzato de Araújo.

**Formal analysis:** Rogério Nabor Kondo, Marco Aurélio Fornazieri.

**Investigation:** Rogério Nabor Kondo, Marco Aurélio Fornazieri.

**Methodology:** Rogério Nabor Kondo, Milene Cripa Pizzato de Araújo, Paulo Muller Ramos, Hélio Amante Miot, Marco Aurélio Fornazieri.

**Project administration:** Rogério Nabor Kondo, Marco Aurélio Fornazieri.

**Software:** Rogério Nabor Kondo, Marco Aurélio Fornazieri.

**Supervision:** Marco Aurélio Fornazieri.

**Validation:** Rogério Nabor Kondo, Paulo Muller Ramos, Hélio Amante Miot, Marco Aurélio Fornazieri.

**Visualization:** Rogério Nabor Kondo, Milene Cripa Pizzato de Araújo, Marco Aurélio Fornazieri.

**Writing – original draft:** Rogério Nabor Kondo, Marco Aurélio Fornazieri.

**Writing – review & editing:** Rogério Nabor Kondo, Milene Cripa Pizzato de Araújo, Paulo Muller Ramos, Hélio Amante Miot, Marco Aurélio Fornazieri.

## References

1. Pavezzi PD, do Prado RB, Boin Filho PÂ, Gon AS, Tuma B, Fornazieri MA, et al. Evaluation of ocular involvement in patients with Hansen's disease. *PLoS Negl Trop Dis.* 2020; 14(9):e0008585. <https://doi.org/10.1371/journal.pntd.0008585> PMID: 32956360

2. Han XY, Seo YH, Sizer KC, Schoberle T, May GS, Spencer JS, et al. A new mycobacterium species causing diffuse lepromatous leprosy. *Am J Clin Pathol*. 2008; 130: 856–864. <https://doi.org/10.1309/AJCPP72FJZZRRVMM> PMID: 19019760
3. WHO. Global leprosy update, 2015. *Weekly Epidemiologic Rec*. 2016; 91:405–420.
4. Foss NT. Hanseníase: aspectos clínicos, imunológicos e terapêuticos. *An Bras Dermatol*. 1999; 74 (2): 113–9.
5. Navon L. Beggars, metaphors, and stigma: a missing link in the social history of leprosy. *Soc Hist Med*. 1998; 11(1):89–105. <https://doi.org/10.1093/shm/11.1.89> PMID: 11620156
6. Naaz F, Mohanty PS, Bansal AK, Kumar D, Gupta UD. Challenges beyond elimination in leprosy. *Int J Mycobacteriol*. 2017; 6(3):222–28. [https://doi.org/10.4103/ijmy.ijmy\\_70\\_17](https://doi.org/10.4103/ijmy.ijmy_70_17) PMID: 28776519
7. Prevedello FC, Mira MT. Hanseníase: uma doença genética? *An Bras Dermatol*. 2007; 82(5):451–9.
8. Araújo MG. Hanseníase no Brasil. *Rev Soc Bras Med Trop*. 2003; 36(3):373–382.
9. Koyuncu M, Celik O, Inan E, Ozturk A. Doppler sonography of vertebral arteries and audiovestibular system investigation in leprosy. *Int J Lepr Other Mycobact Dis* 1995; 63: 23–27. PMID: 7730715
10. Yowan P, Danneman K, Koshy S, Richard J, Daniel E. Knowledge and practice of eye-care among leprosy patients. *Indian J Lepr* 2002; 74:129–135. PMID: 12708731
11. Soni NK. Leprosy of the tongue. *Indian J Lepr* 1992; 64: 325–330. PMID: 1431321
12. Veyseller B, Aksoy F, Yildirim YS, Açikalin RM, Gürbüz D, Ozturan O. Olfactory dysfunction and olfactory bulb volume reduction in patients with leprosy. *Indian J Otolaryngol Head Neck Surg*. 2012 Sep; 64 (3):261–5. <https://doi.org/10.1007/s12070-011-0284-9> Epub 2011 Aug 27. PMID: 23998032
13. Barton RP. Clinical manifestation of leprosy rhinitis. *Ann Otol Rhinol Laryngol* 1976; 85:74–82. <https://doi.org/10.1177/000348947608500113> PMID: 1259317
14. Mishra A, Saito K, Barbash SE, Mishra N, Doty R. Olfactory Dysfunction in Leprosy. *Laryngoscope*. 2006; 116:413–416. <https://doi.org/10.1097/01.MLG.0000195001.03483.F2> PMID: 16540900
15. Bottene IMC, Reis VMS. Quality of life of patients with paucibacillary leprosy. *An Bras Dermatol*. 2012; 48(3):408–11. <https://doi.org/10.1590/s0365-05962012000300009> PMID: 22714756
16. Doty RL. Age-Related Deficits in Taste and Smell. *Otolaryngol Clin North Am*. 2018 Aug; 51(4):815–825. <https://doi.org/10.1016/j.otc.2018.03.014> PMID: 30001793
17. Fornazieri MA, Doty RL, Santos CA, Pinna FR, Bezerra TFP, Voegels RL. A new cultural adaptation of the University of Pennsylvania Smell Identification Test. *Clinics*. 2013; 68(1):65–8. [https://doi.org/10.6061/clinics/2013\(01\)oa10](https://doi.org/10.6061/clinics/2013(01)oa10) PMID: 23420159
18. Boscolo-Rizzo P, Menegaldo A, Fabbris C, Spinato G, Borsetto D, Vaira LA, et al. Six-Month Psychophysical Evaluation of Olfactory Dysfunction in Patients with COVID-19. *Chem Senses*. 2021 Jan 1; 46: bjab006. <https://doi.org/10.1093/chemse/bjab006> PMID: 33575808
19. Menon C, Westervelt HJ, Jahn DR, Dressel JA, O'Bryant SE. Normative performance on the Brief Smell Identification Test (BSIT) in a multi-ethnic bilingual cohort: a Project FRONTIER study. *Clin Neuropsychol*. 2013; 27(6):946–961. <https://doi.org/10.1080/13854046.2013.796406> PMID: 23634698
20. Doty RL, Kamath V. The influences of age on olfaction: a review. *Front Psychol*. 2014; 5:20. <https://doi.org/10.3389/fpsyg.2014.00020> PMID: 24570664
21. Fornazieri MA, Doty RL, Bezerra TFP, Pina FR, Costa FO, Voegels RL, et al. Relationship of socioeconomic status to olfactory function. *Physiol Behav*. 2019 Jan 1; 198:84–89. <https://doi.org/10.1016/j.physbeh.2018.10.011> PMID: 30336228
22. Camacho ID, Burdick A, Benjamin L, Casiano R. Chronic rhinitis: a manifestation of leprosy. *Ear Nose Throat J*. 2011; 90(9):E1–3. <https://doi.org/10.1177/014556131109000915> PMID: 21938685
23. Torre J. Manifestaciones nasales de la lepra. *Rev Cuba Med Gen Integr*. 2015; 31(1):52–60.
24. Horikiri K, Kikuta S, Kanaya K, Shimizu Y, Nishijima H, Yamasoba T, Kondo K. Intravenous olfactory test latency correlates with improvement in post-infectious olfactory dysfunction. *Acta Otolaryngol*. 2017; 137(10):1083–1089. <https://doi.org/10.1080/00016489.2017.1325005> PMID: 28503989
